# Supplementary material for: Hydrogen storage in a chemical bond stabilized Co9S8–graphene layered structure
Source: Royal Society of Chemistry journal article supplement (doi:10.1039/c5nr06116d), 2015-01-01
Supplement: c5nr06116d1.pdf [file c5nr06116d1.pdf]

## Supporting Information

### Carbon-Sulfur Bond Stabilized $\text{Co}_9\text{S}_8$ -Graphene Layered Structure with Excellent Hydrogen Storage Capacity

Wei Qin<sup>a,\*</sup>, Lu Han<sup>b</sup>, Hai Bi<sup>b</sup>, Jiahuang Jian<sup>b</sup>, Xiaohong Wu<sup>b,\*</sup>, Peng Gao<sup>c,\*</sup>

<sup>a</sup> School of Materials Science and Engineering, Harbin Institute of Technology, Harbin, Heilongjiang  
150001, PR China. E-mail: qinwei@hit.edu.cn

<sup>b</sup> Department of Chemistry, Harbin Institute of Technology, Harbin, Heilongjiang 150001, PR China.  
E-mail: wuxiaohong@hit.edu.cn

<sup>c</sup> Key Laboratory of Superlight Materials and Surface Technology, Ministry of Education, Harbin  
Engineering University, Harbin, Heilongjiang 150001, PR China. E-mail: gaopeng@hrbeu.edu.cn

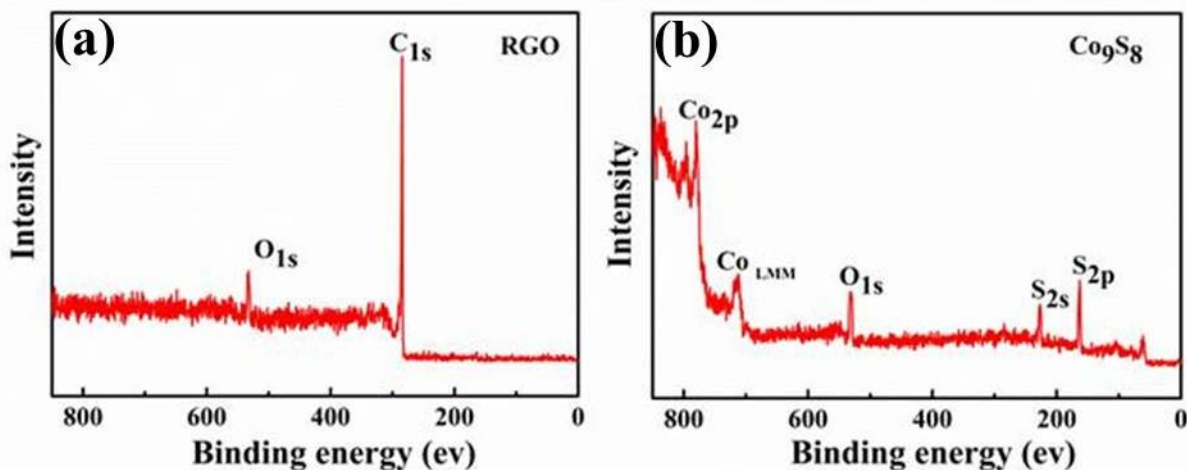

Figure S1. XPS spectrum of: (a) RGO; (b)  $\text{Co}_9\text{S}_8$ .

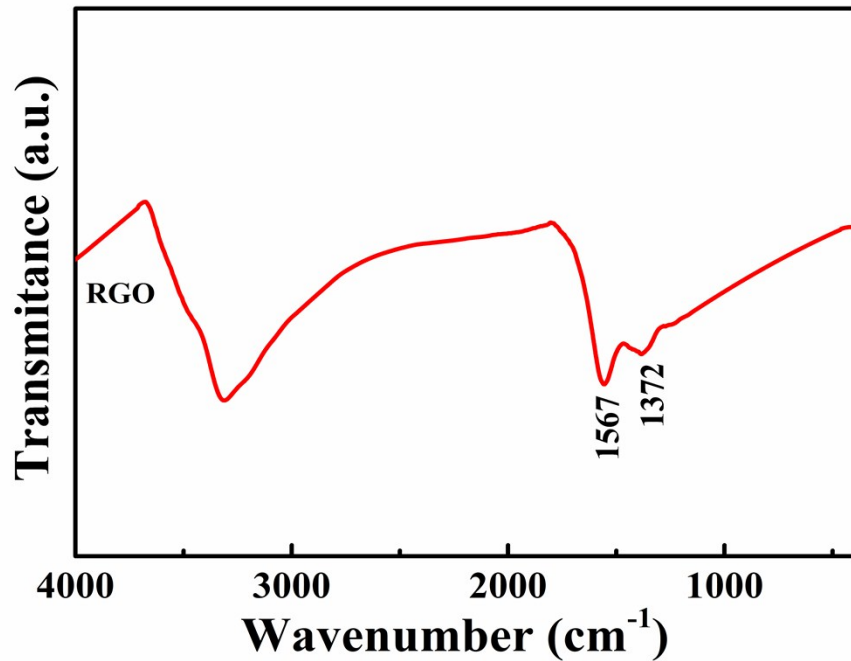

**Figure S2.** FTIR spectrum of ball milled RGO at the speed of 600 rpm for 15h under Ar gas atmosphere.

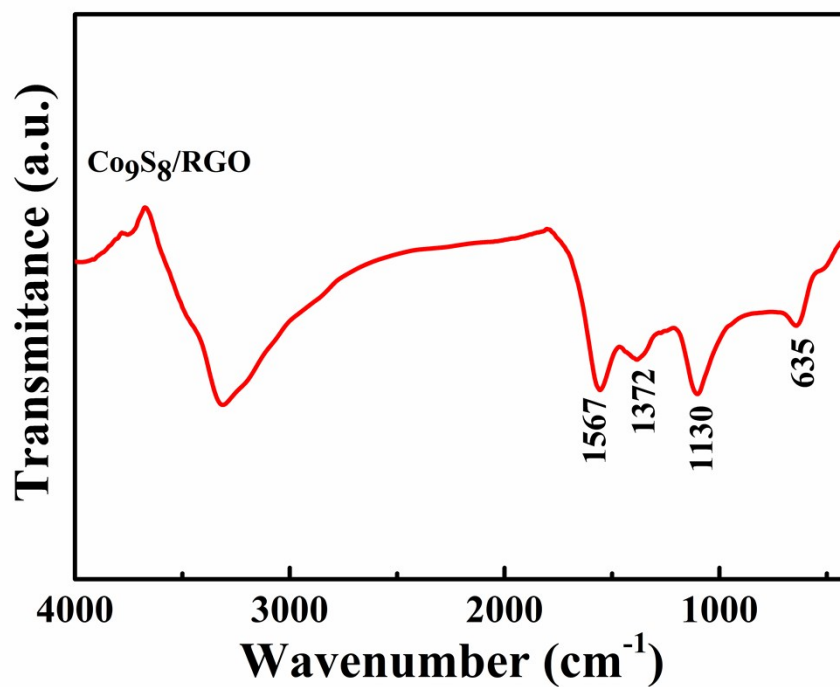

**Figure S3.** FTIR spectrum of discharged  $\text{Co}_9\text{S}_8/\text{RGO}$  composite ( $m_{\text{Co}_9\text{S}_8}:m_{\text{RGO}} = 6:1$ ).

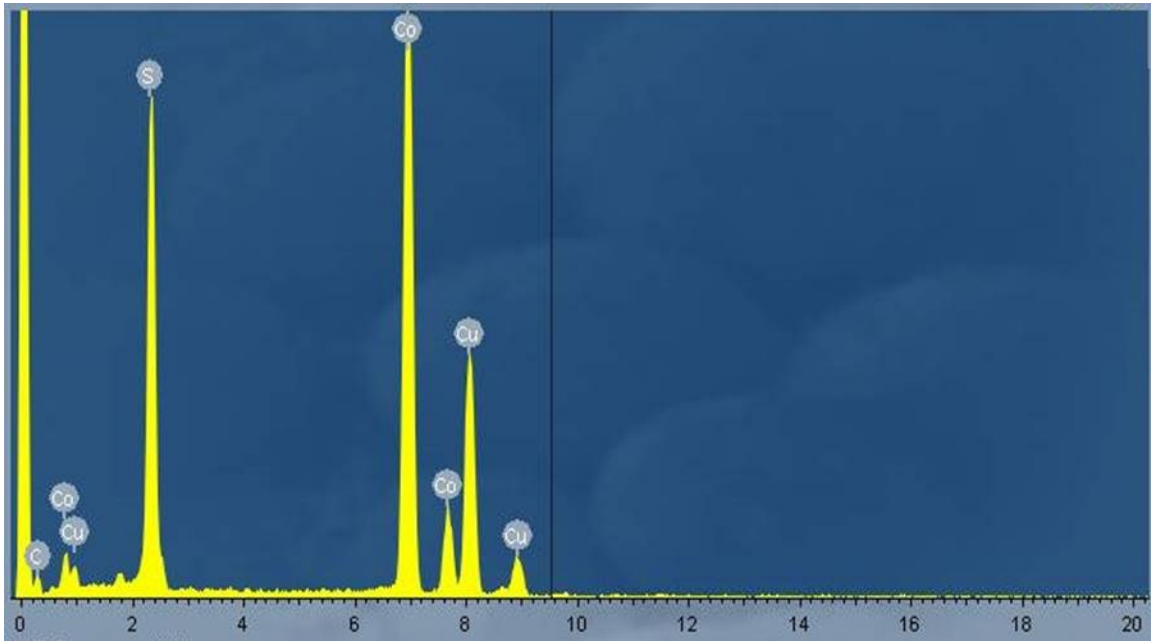

**Figure S4.** EDS images of the  $\text{Co}_9\text{S}_8/\text{RGO}$  composite.

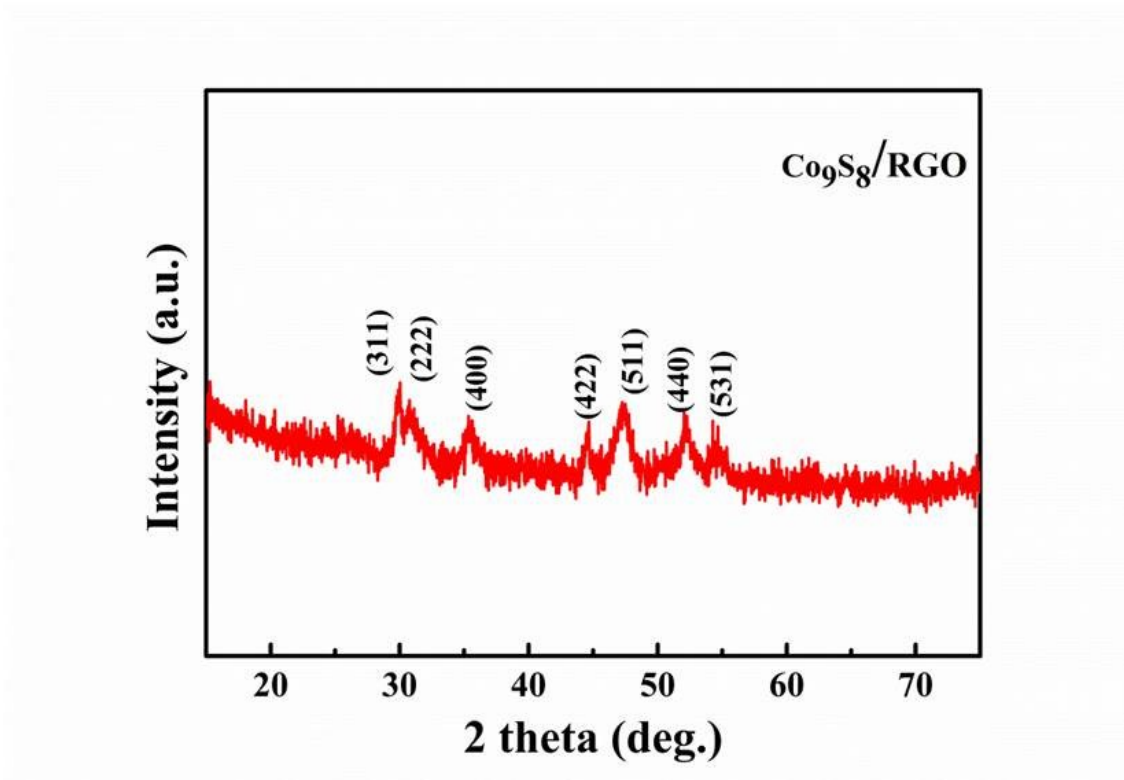

**Figure S5.** XRD patterns of the discharged  $\text{Co}_9\text{S}_8/\text{RGO}$  composite ( $m_{\text{Co}_9\text{S}_8}:m_{\text{RGO}} = 6:1$ ).

**Table S1.** Elemental content of the Co<sub>9</sub>S<sub>8</sub>/RGO composite.

| Sample                              | Atomic percent (wt%) |       |       |       |
|-------------------------------------|----------------------|-------|-------|-------|
|                                     | C                    | S     | Co    | Cu    |
| Co <sub>9</sub> S <sub>8</sub> /RGO | 5.59                 | 35.90 | 40.92 | 17.59 |

**Table S2.** Capacity retention ratio of the Co<sub>9</sub>S<sub>8</sub>/RGO composite with the weight ratios of (a) 4:1; (b) 5:1; (c) 7:1; (d) 8:1..

| Sample<br>m <sub>Co<sub>9</sub>S<sub>8</sub></sub> :m <sub>RGO</sub> | Hydrogen storage<br>capacity (wt%) | Capacity after 50<br>cycles (wt%) | Capacity retention<br>ratio (%) |
|----------------------------------------------------------------------|------------------------------------|-----------------------------------|---------------------------------|
| 4:1                                                                  | 4.26                               | 3.00                              | 70                              |
| 5:1                                                                  | 4.57                               | 3.48                              | 76                              |
| 6:1                                                                  | 4.86                               | 3.90                              | 80                              |
| 7:1                                                                  | 3.96                               | 2.42                              | 61                              |
| 8:1                                                                  | 3.60                               | 2.09                              | 58                              |
